# Supplementary figures and images for: Rapid exchange of oil-phase in microencapsulation chip to enhance cell viability
Source: Royal Society of Chemistry journal article supplement (doi:10.1039/b819044e), 2009-01-01

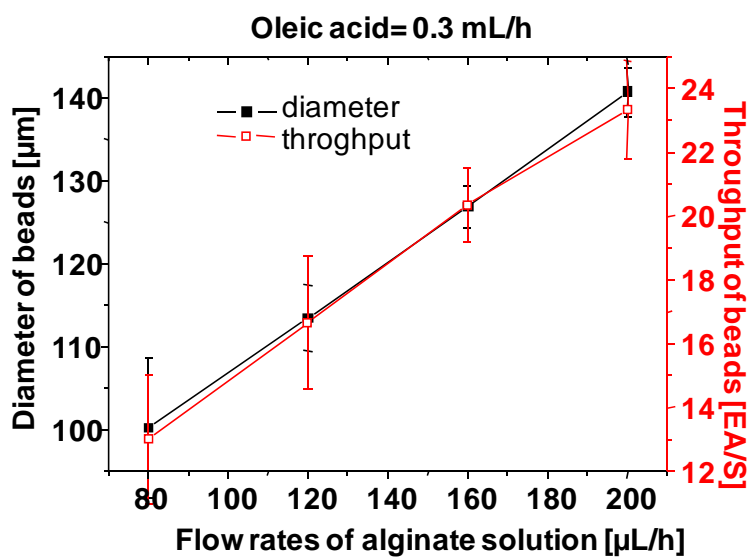

(a)

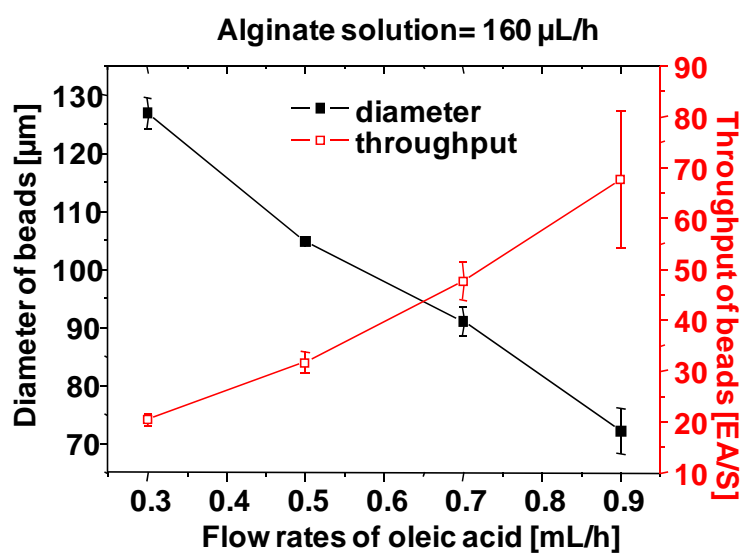

(b)

**Figure S-1 Kim et al.**

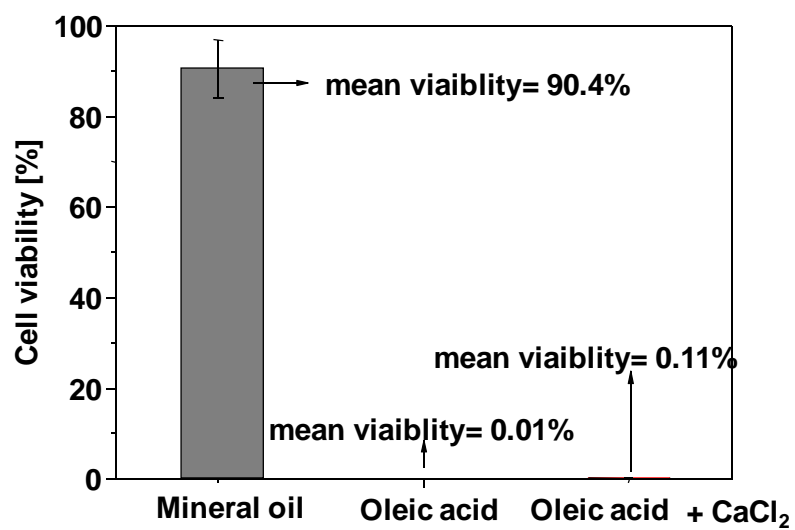

**Figure S-2** *Kim et al.*

Supplement: b819044e_supplementary_figures.pdf [file b819044e_supplementary_figures.pdf]
